# Supplementary material for: Formation of multinucleated osteoclasts depends on an oxidized species of cell surface-associated La protein
Source: eLife. 2024 Oct 2;13:RP98665. doi: 10.7554/eLife.98665 (PMC11446546; doi:10.7554/eLife.98665)
Supplement: Figure 1—source data 1. [file elife-98665-fig1-data1.xlsx]

## Sheet: Figure 1c
Normalized, Presented Data							Raw Flourescence Insinsity Measurments for Statistical Analysis
Pan AB ctl	Pan AB TCEP	Ox. AB ctl	Ox. AB TCEP	Red. AB ctl	Red. AB Ox.		Pan AB ctl	Pan AB TCEP	Ox. AB ctl	Ox. AB TCEP	Red. AB ctl	Red. AB Ox.
1	1.21822	1	0.518419	1	1.85699		2397.94	2921.22	2274.01	1178.89	404.127	750.458
1	1.14985	1	0.510316	1	3.64575		3000.55	3450.17	1560.66	796.432	120.712	440.085
1	0.972821	1	0.500476	1	5.94627		3128.85	3043.81	2731.94	1367.27	361.24	2148.03
