# Supplementary material for: Formation of multinucleated osteoclasts depends on an oxidized species of cell surface-associated La protein
Source: eLife. 2024 Oct 2;13:RP98665. doi: 10.7554/eLife.98665 (PMC11446546; doi:10.7554/eLife.98665)
Supplement: Figure 2—source data 1. [file elife-98665-fig2-data1.xlsx]

## Sheet: Figure 2b
Normalized, Presented Data							Raw Fusion events divided by total number of nuclei for Statistical Analysis
LPC	Wash	Pan AB	Red AB	Ox. AB			LPC	Wash	Pan AB	Red AB	Ox. AB
0.065287	1	0.371635	0.832256	0.425659			0.008292	0.127004	0.047199	0.1057	0.05406
0.096588	1	0.35799	0.765866	0.426643			0.024175	0.250287	0.0896	0.191686	0.106783
0.08485	1	0.529423	1.10315	0.586123			0.014218	0.167566	0.088713	0.18485	0.098214
0.027371	1	0.526554	0.937265	0.646596			0.003938	0.143875	0.075758	0.134849	0.093029
0.076769	1	0.639164	0.933158	0.559249			0.002685	0.034976	0.022356	0.032638	0.01956
