# Supplementary material for: Formation of multinucleated osteoclasts depends on an oxidized species of cell surface-associated La protein
Source: eLife. 2024 Oct 2;13:RP98665. doi: 10.7554/eLife.98665 (PMC11446546; doi:10.7554/eLife.98665)
Supplement: Figure 2—source data 2. [file elife-98665-fig2-data2.xlsx]

## Sheet: Figure 2c
Normalized, presented data								Raw Fusion events divided by total number of nuclei for Statistical Analysis
		TCEP								TCEP
LPC	Wash	25	100	250	500			LPC	Wash	25	100	250	500
0.18874	1	0.600089	0.832853	0.573938	0.423116			0.029736	0.15755	0.094544	0.131216	0.090424	0.066662
0.214713	1		0.475158	0.498976	0.641298			0.016245	0.075659		0.03595	0.037752	0.04852
0.048685	1	0.697239	0.240969	0.252909	0.324268			0.010712	0.220028	0.153412	0.05302	0.055647	0.071348
0.060012	1		0.628789	0.668896	0.43198			0.006497	0.108262		0.068074	0.072416	0.046767
