# Supplementary material for: Formation of multinucleated osteoclasts depends on an oxidized species of cell surface-associated La protein
Source: eLife. 2024 Oct 2;13:RP98665. doi: 10.7554/eLife.98665 (PMC11446546; doi:10.7554/eLife.98665)
Supplement: Figure 3—source data 1. [file elife-98665-fig3-data1.xlsx]

## Sheet: Figure 3b
Normalized, Presented Data					Raw Fusion Events divided by the total number of nuclei
Ctl	La 194-408	Reduced			Ctl	La 194-408	Reduced
1	3.8748	2.16875			0.019193	0.07437	0.041626
1	3.30792	2.16875			0.01049	0.034703	0.0237
1	6.09	2.04			0.032394	0.197389	0.066025
