# Supplementary material for: Formation of multinucleated osteoclasts depends on an oxidized species of cell surface-associated La protein
Source: eLife. 2024 Oct 2;13:RP98665. doi: 10.7554/eLife.98665 (PMC11446546; doi:10.7554/eLife.98665)
Supplement: Figure 3—source data 2. [file elife-98665-fig3-data2.xlsx]

## Sheet: Figure 3c
Normalized, Presented Data					Raw Flourescent Resorption measurments
Ctl	La 194-408	Reduced			Ctl	La 194-408	Reduced
1	1.32906	1.17654			148870	197858	175152
1	1.51465	1.14714			126596	191748	145223
1	2.08	1.4			37946	78793	52987
1	1.6137	1.19715			67967.5	109680	81367.5
