# Supplementary material for: Formation of multinucleated osteoclasts depends on an oxidized species of cell surface-associated La protein
Source: eLife. 2024 Oct 2;13:RP98665. doi: 10.7554/eLife.98665 (PMC11446546; doi:10.7554/eLife.98665)
Supplement: Figure 4—source data 3. [file elife-98665-fig4-data3.xlsx]

## Sheet: Figure 4d
Normalized, Presented Data					Raw Fusion events divided by total number of nuclei used for statistical analysis
Control	La 194-408	La Cys Mut			Control	La 194-408	La Cys Mut
1	2.025	1.42			0.0063	0.013	0.009
1	1.476	1.387			0.085	0.125	0.118
1	1.513	0.862			0.038	0.058	0.033
1	1.483	0.875			0.041	0.06	0.035
