# Supplementary material for: Formation of multinucleated osteoclasts depends on an oxidized species of cell surface-associated La protein
Source: eLife. 2024 Oct 2;13:RP98665. doi: 10.7554/eLife.98665 (PMC11446546; doi:10.7554/eLife.98665)
Supplement: Figure 5—figure supplement 1—source data 1. [file elife-98665-fig5-figsupp1-data1.xlsx]

## Sheet: Fig. 5-fig supp 1
Normalized, Presented Data			Raw Data, Flourescent Intensity
Control	NAC		Control	NAC
1	0.507188		2766.87	1403.32
1	0.727432		2389.31	1738.06
1	0.896506		4876.57	4371.88
1	0.63173		1042.38	658.505
1	0.757846		2863.18	2169.85
