# Supplementary material for: Formation of multinucleated osteoclasts depends on an oxidized species of cell surface-associated La protein
Source: eLife. 2024 Oct 2;13:RP98665. doi: 10.7554/eLife.98665 (PMC11446546; doi:10.7554/eLife.98665)
Supplement: Figure 5—figure supplement 1—source data 2. [file elife-98665-fig5-figsupp1-data2.xlsx]

## Sheet: Fig. 5-fig supp 2
Normalized, Presented Data				Raw Flourescent Intensity
Control	NAC			Control	NAC
1	1.54			8142.82	12544
1	1.46273			12881.9	18842.8
