# Supplementary material for: Formation of multinucleated osteoclasts depends on an oxidized species of cell surface-associated La protein
Source: eLife. 2024 Oct 2;13:RP98665. doi: 10.7554/eLife.98665 (PMC11446546; doi:10.7554/eLife.98665)
Supplement: Figure 5—source data 1. [file elife-98665-fig5-data1.xlsx]

## Sheet: Figure 5b
Normalized, Presented Data							Raw Flourescent Measurments used for Statistical Analysis
Progenitors	RANKL	RANKL+NAC					Progenitors	RANKL	RANKL+NAC
	1	0.498						1385.98	690.37
	1	0.285						590.25	168.22
0.254	1	0.5					953.57	1823.51
0.523	1						347.74	1366.87	683.49
