# Supplementary material for: Formation of multinucleated osteoclasts depends on an oxidized species of cell surface-associated La protein
Source: eLife. 2024 Oct 2;13:RP98665. doi: 10.7554/eLife.98665 (PMC11446546; doi:10.7554/eLife.98665)
Supplement: Figure 5—source data 2. [file elife-98665-fig5-data2.xlsx]

## Sheet: Figure 5c
Fold Values Presented										Delta CT Values used for Statistical Analysis
NFATc1		cFOS		SSB		ANXA5				NFATc1		cFOS		SSB		ANXA5
Ctl	NAC	Ctl	NAC	Ctl	NAC	Ctl	NAC			Ctl	NAC	Ctl	NAC	Ctl	NAC	Ctl	NAC
1	0.85	1	2.03	1	0.9	1	0.86			10.51	9.3	7.58	7.29	7.05	6.53	2.71	2.53
1	0.26	1	0.91	1	1.1	1	1.2			7.32	9.26	7.2	7.34	6.01	5.88	2.1	1.83
1	2.32	1	1.22	1	1.43	1	1.13			8.94	9.18	7.29	6.27	5.93	6.07	2.63	2.85
1	0.58	1	0.69	1	1.1	1	1.02			8.61	9.39	6.04	6.57	5.46	5.33	1.17	1.13
