# Supplementary material for: Formation of multinucleated osteoclasts depends on an oxidized species of cell surface-associated La protein
Source: eLife. 2024 Oct 2;13:RP98665. doi: 10.7554/eLife.98665 (PMC11446546; doi:10.7554/eLife.98665)
Supplement: Figure 5—source data 3. [file elife-98665-fig5-data3.xlsx]

## Sheet: Figure 5d
Normalized, presented data					Raw Fusion events divided by total number of nuclei
Control	50 NAC	100 NAC			Control	50 NAC	100 NAC
1	0.56	0.19			0.096	0.054	0.018
1	0.42	0.37			0.06	0.025	0.022
1	0.59	0.15			0.233	0.137	0.034
1	0.59	0.47			0.019	0.011	0.009
1	0.19	0.36			0.023	0.004	0.008
1	0.09	0.21			0.078	0.007	0.016
