# Supplementary material for: Formation of multinucleated osteoclasts depends on an oxidized species of cell surface-associated La protein
Source: eLife. 2024 Oct 2;13:RP98665. doi: 10.7554/eLife.98665 (PMC11446546; doi:10.7554/eLife.98665)
Supplement: Figure 5—source data 4. [file elife-98665-fig5-data4.xlsx]

## Sheet: Figure 5e
Normalized, Presented Data				Raw Flourescent intensity used for statstical analysis
Ctl	NAC			Control	Nac
1	0.738			695.52	513.12
1	0.714			292.21	208.72
1	0.664			1393.46	926.23
1	0.913			523.09	477.6
1	0.728			752.4	548.1
1	0.697			2147.85	1497.44
1	0.55			2847.14	1566.77
1	0.61			2147.85	1309.69
1	0.887			768.62	548.1
				4360.59	3866.47
