# Supplementary material for: Formation of multinucleated osteoclasts depends on an oxidized species of cell surface-associated La protein
Source: eLife. 2024 Oct 2;13:RP98665. doi: 10.7554/eLife.98665 (PMC11446546; doi:10.7554/eLife.98665)
Supplement: Figure 6—source data 1. [file elife-98665-fig6-data1.xlsx]

## Sheet: Fig. 6b
Normalized, Presented Data				Raw Data, PhosphoLa Flourescent Intensity divided by Hoechst control
Control	NAC			Control	NAC
1	2.11			0.294	0.62
1	2.04			0.079	0.16
1	1.559			1.094	1.706
