# Supplementary material for: Formation of multinucleated osteoclasts depends on an oxidized species of cell surface-associated La protein
Source: eLife. 2024 Oct 2;13:RP98665. doi: 10.7554/eLife.98665 (PMC11446546; doi:10.7554/eLife.98665)
Supplement: Figure 6—source data 2. [file elife-98665-fig6-data2.xlsx]

## Sheet: Fig. 6d
Normalized Presented Data									Raw data used for statistical evaluation
ctl	NAC	La 194-408	La Cys Mut						ctl	NAC	La 194-408	La Cys Mut
1	0.448	0.904	0.599						0.041	0.018	0.037	0.024
1	0.548	0.904	0.982						0.024	0.013	0.022	0.024
1	0.395	0.831	0.454						0.008	0.003	0.006	0.003
1	0.295	0.676	0.566						0.013	0.004	0.009	0.007
1	0.503	1.06	0.786						0.028	0.014	0.03	0.022
